# Supplementary material
Source: MDPI journal article supplement (https://www.mdpi.com/2073-445X/12/5/1107)
Supplement: s1 [file s1]

## Supplementary materials

### Post-tin-mining agricultural soil regeneration using local organic amendments improve nitrogen fixation and uptake in legume-cassava intercropping system

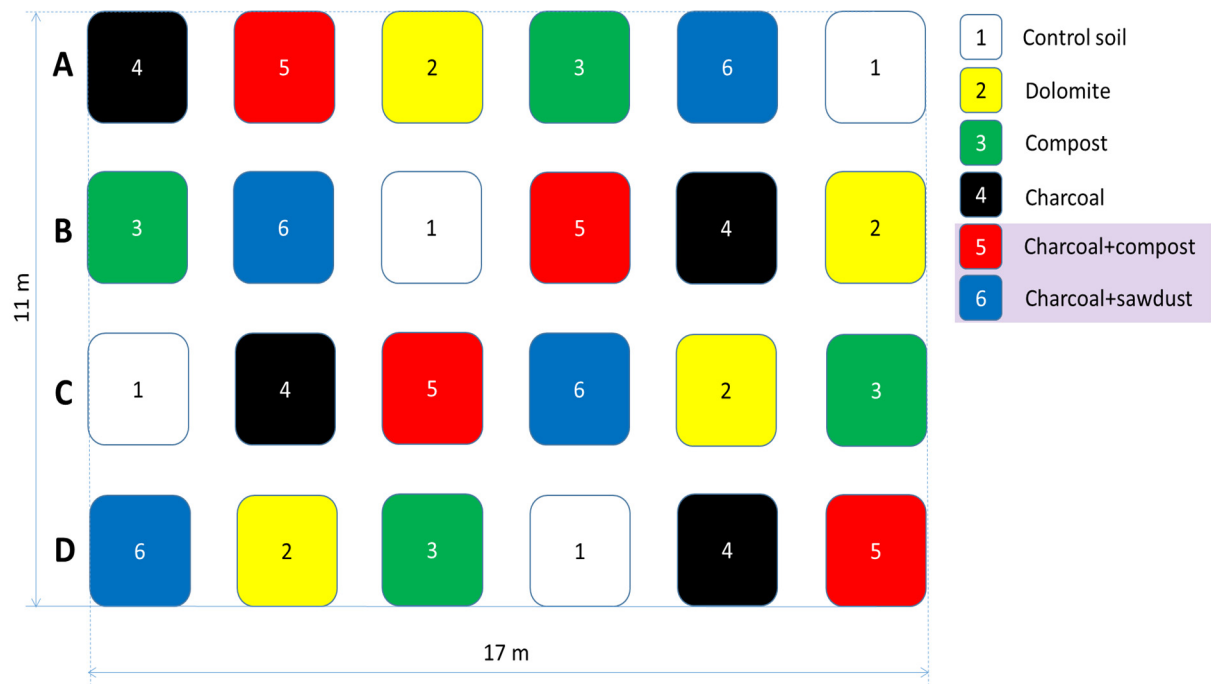

**Figure S1.** Overview of the treatments according to the randomized complete block design (RCBD) in post-tin-mining area.

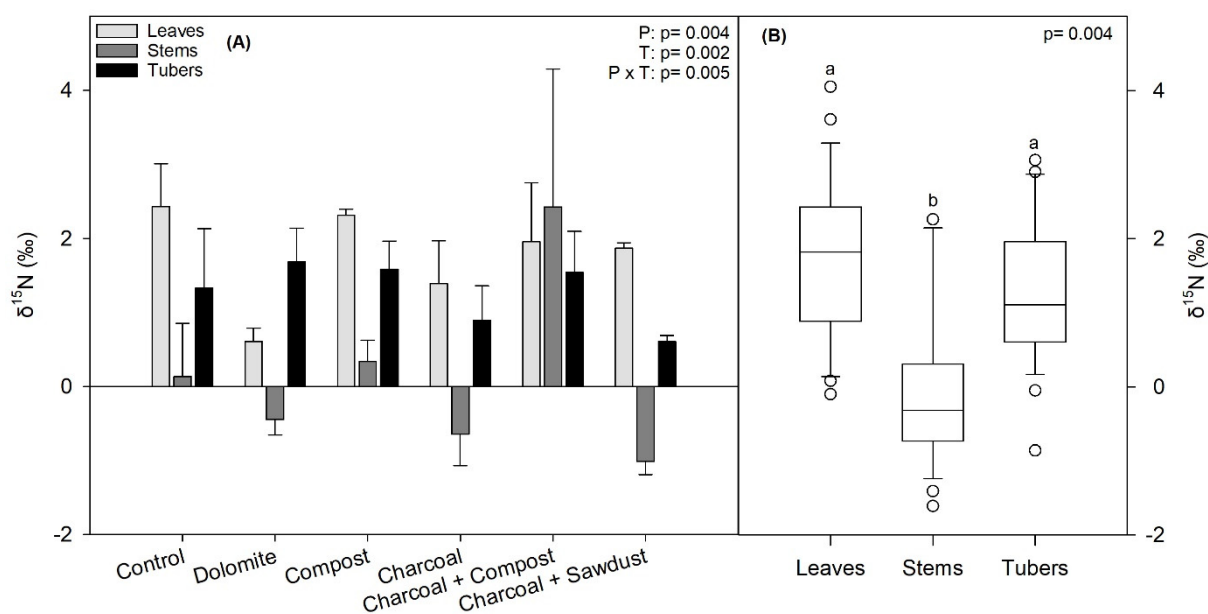

**Figure S2.** Nitrogen isotope discrimination ( $\delta^{15}\text{N}$ ) in plant parts of cassava under different treatments. Values are mean  $\pm$  SE ( $n = 4$ ). The main effects of the plant part (P), treatment (T), and the interaction of plant part and treatment (P  $\times$  T) on nitrogen isotope discrimination were determined using robust two-way ANOVA. Regular lowercase letters in (B) indicate significant differences between plant part using post hoc linear contrast test on trimmed means at  $p < 0.05$ . In (B), open circles indicate outliers.

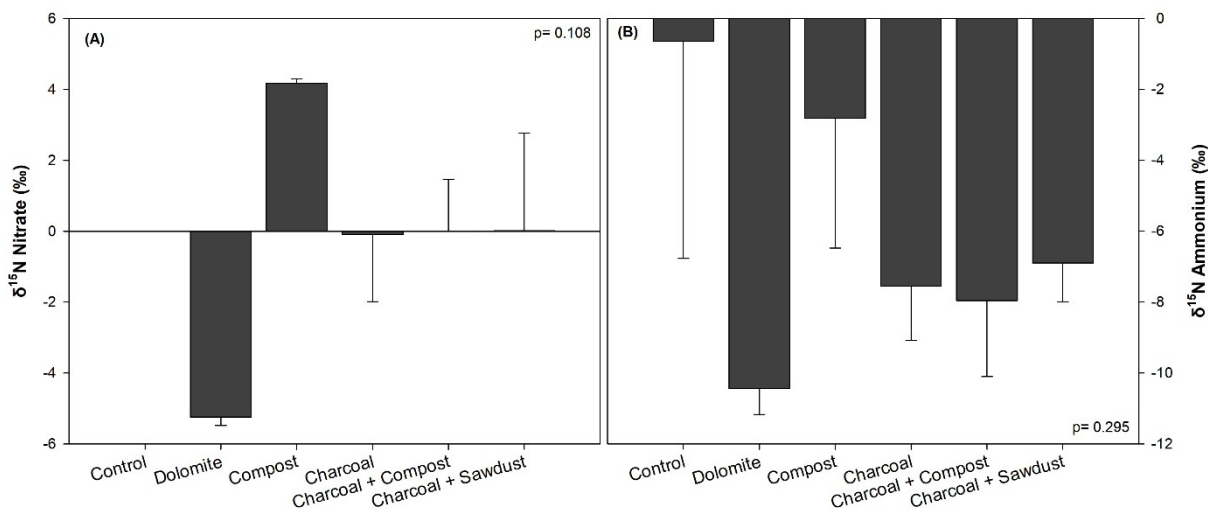

**Figure S3.** Nitrogen isotope discrimination ( $\delta^{15}\text{N}$ ) in soil under different treatments. Values are mean  $\pm$  SE ( $n = 4$ ). The effect of treatment on the  $\delta^{15}\text{N}$  nitrate and  $\delta^{15}\text{N}$  ammonium was determined using robust one-way ANOVA.
